# Supplementary material
Source: PubMed Central journal article supplement (PMC3933634)
Supplement: 11693_2014_9135_MOESM1_ESM.pdf [file 11693_2014_9135_MOESM1_ESM.pdf]

# Package ‘mycobacrV’

November 29, 2013

**Type** Package

**Title** Integrative immunoinformatics for Mycobacterial diseases in R platform

**Version** 1.0

**Date** 2013-11-27

**Author** Deepika Kulshreshtha, Rupanjali Chaudhuri, Dr. S. Ramachandran

**Maintainer** Dr. S. Ramachandran<ramu@igib.in>

**Description** The mycobacrV package contains utilities to provide detailed information for B cell and T cell epitopes for predicted adhesins from various servers such as ABCpred, Bcepred, Bimas, Propred, NetMHC and IEDB. Please refer to the URL below for more information.

**Depends** R (>= 2.15), methods

**Collate** 'iedb\_consensus\_mhci\_nmer.R' 'abcpred\_nmer.R' 'algpred.R'  
'allermatch.R' 'bcepred\_nmer.R' 'bimas\_nmer.R' 'filter.firstlayer.R' 'iedb\_arb\_mhcii\_nmer.R'  
'iedb\_consensus\_mhcii\_nmer.R' 'netmhcNN\_nmer.R'  
'netmhcWT\_nmer.R' 'propred\_nmer.R' 'iedb\_arb\_mhci\_nmer.R' 'zzz.R'

**License** GPL-2

## R topics documented:

|                           |    |
|---------------------------|----|
| abcpred_nmer              | 1  |
| algpred                   | 2  |
| allermatch                | 3  |
| bcepred_nmer              | 4  |
| bimas_nmer                | 4  |
| filter.firstlayer         | 5  |
| iedb_arb_mhcii_nmer       | 6  |
| iedb_arb_mhci_nmer        | 7  |
| iedb_consensus_mhcii_nmer | 7  |
| iedb_consensus_mhci_nmer  | 8  |
| netmhcNN_nmer             | 9  |
| netmhcWT_nmer             | 10 |
| propred_nmer              | 10 |

abcpred\_nmer

*Epitope prediction from ABCpred server*

---

**Description**

abcpred\_nmer is a method to get information of epitopes from ABCPred server

**Usage**

```
abcpred_nmer(epi_length)
```

**Arguments**

epi\_length     A character vector of epitope length

**Details**

This function takes epitope length as input into epi\_length object. ABCPred server provide epitopes by selecting window size of epitope length such as 10, 12, 14, 16, 18, 20. Therefore epi\_length should be given as "10mer".

**Value**

abcpred\_nmer() will write two files in the working directory. One file contains the information of epitope and the other file contains metadata for epitope that shows orthologs of H37Rv containing that epitope

**Author(s)**

Deepika Kulshreshtha

**Examples**

```
## Not run: abcpred_nmer("10mer")##Here abcpred_nmer will provide conservation of epitope
```

---

algpred*Filter Allergic/Non Allergic proteins using output of Algpred*

---

**Description**

algpred is a function to filter allergic and non allergic proteins of an organism using output of Algpred

**Usage**

```
algpred(xz, organism, ginumber, prediction)
```

**Arguments**

|            |                                                                                                              |
|------------|--------------------------------------------------------------------------------------------------------------|
| xz         | Object containing tabular output from Algpred                                                                |
| organism   | A character vector specifying name of species present in second column of xz                                 |
| ginumber   | A numeric vector specifying ginumber of protein for a species for which allergic property is to be predicted |
| prediction | A character vector specifying "Allergen" or "Non Allergen"                                                   |

**Details**

This function takes tabular output of Algpred in xz as input. Using arguments organism, ginumber and prediction algpred() filters xz. Default value for ginumber is "ALL" and for prediction is "Non Allergen"

**Value**

A file of filtered proteins named "filtered\_algpred.txt" using the given arguments.

**Author(s)**

Deepika Kulshreshtha

**See Also**

[allermatch](#)

**Examples**

```
## Not run: algpred(xz,organism="Mycobacterium abscessus ATCC 19977")
```

---

allermatch

*Filter Allergic/Non Allergic proteins using output of Allermatch*

---

**Description**

allermatch is a function to filter allergic and non allergic proteins of an organism using output of Allermatch

**Usage**

```
allermatch(xz, organism, ginumber, prediction)
```

**Arguments**

|            |                                                                                                              |
|------------|--------------------------------------------------------------------------------------------------------------|
| xz         | Object containing tabular output from Allermatch                                                             |
| organism   | A character vector specifying name of species present in second column of xz                                 |
| ginumber   | A numeric vector specifying ginumber of protein for a species for which allergic property is to be predicted |
| prediction | A character vector specifying "Allergen" or "Non Allergen"                                                   |

**Details**

This function takes tabular output of Allermatch in xz as input. Using arguments organism, ginumber and prediction allermatch() filters xz. Default value for ginumber is "ALL" and for prediction is "Non Allergen"

**Value**

A file of filtered proteins named "filtered\_allermatch.txt" using the given arguments.

**Author(s)**

Deepika Kulshreshtha

**See Also**

[algpred](#)

**Examples**

```
## Not run: allermatch(xz,organism="Mycobacterium abscessus ATCC 19977")
```

---

bcepred\_nmer

*Epitope prediction from Bcepred server*

---

**Description**

bcepred\_nmer is a method to get information of epitopes from Bcepred server

**Usage**

```
bcepred_nmer(clas)
```

**Arguments**

clas                    A character vector for server name

**Details**

This function takes server name "bcepred" as input into clas object. Bcepred server provides epitopes of different length.

**Value**

bcepred\_nmer() will write two files in the working directory. One file contains the information of epitope and the other file contains metadata for epitope showing orthologs of H37Rv

**Author(s)**

Deepika Kulshreshtha

**Examples**

```
## Not run: bcepred_nmer("bcepred") ##Here bcepred_nmer will provide conservation of epitope
```

---

`bimas_nmer`*Epitope prediction from Bimas server*

---

**Description**

`bimas_nmer` is a method to get information of epitopes from Bimas server

**Usage**

```
bimas_nmer(epi_length)
```

**Arguments**

`epi_length` A character vector of epitope length

**Details**

This function takes epitope length as input into `epi_length` object. Bimas server provide epitopes by selecting window size of epitope length such as 8, 9 and 10. Therefore `epi_length` should be given as "10mer".

**Value**

`bimas_nmer()` will write two files in the working directory. One file contains the information of epitope and the other file contains metadata for epitope showing orthologs of H37Rv

**Author(s)**

Deepika Kulshreshtha

**Examples**

```
## Not run: bimas_nmer("10mer") ## Here bimas_nmer will provide conservation of epitopes of
```

---

`filter.firstlayer` *Filter first layer data*

---

**Description**

`filter.firstlayer` is a function to filter first layer data

**Usage**

```
filter.firstlayer(xz, organism, ginumber, spaanscore, subcelllocal, tmhelices, H
```

**Arguments**

|              |                                                                          |
|--------------|--------------------------------------------------------------------------|
| xz           | object containing first layer data table                                 |
| organism     | A character vector specifying species name                               |
| ginumber     | A numeric vector specifying ginumber                                     |
| spaanscore   | A numeric vector specifying SPAAN score                                  |
| subcelllocal | A character vector specifying location of the protein                    |
| tmhelices    | A numeric vector specifying number of TM helix                           |
| Hrefhits     | A character vector specifying non similarity to Human Reference Proteins |

**Details**

This function filters the first layer data according to "motif and topology", "subcellular location" and "homology". Default value for ginumber,spaanscore,subcelllocal,tmhelices and Hrefhits is "ALL", >0.6, "Extracellular OR Cellwall", <2 and "No Hits found"

**Value**

A file of filtered proteins named "filtered\_firstlayer.txt" using the given arguments

**Author(s)**

Deepika Kulshreshtha, Rupanjali Chaudhuri, Dr. S. Ramachandran

**Examples**

```
## Not run: filter.firstlayer(xz,organism="Mycobacterium abscessus ATCC 19977")
```

---

iedb\_arb\_mhcii\_nmer

*Epitope conservation prediction for MHCII using IEDB-ARB server information*

---

**Description**

iedb\_arb\_mhcii\_nmer is a method to predict conservation of epitopes among orthologs for MHCII using IEDB-ARB server data

**Usage**

```
iedb_arb_mhcii_nmer(clas)
```

**Arguments**

|      |                                    |
|------|------------------------------------|
| clas | A character vector for server name |
|------|------------------------------------|

**Details**

This function takes server name "IEDB\_arbMHCII" as input into clas object. IEDB-ARB server provides epitopes of different length.

**Value**

iedb\_arb\_mhcii\_nmer() will write two files in the working directory. One file contains the information of epitope and the other file contains metadata for epitope showing orthologs of H37Rv

**Author(s)**

Deepika Kulshreshtha

**Examples**

```
## Not run: iedb_arb_mhcii_nmer("IEDB_arbMHCII")##Here IEDB_arb_mhcii_nmer will provide c
```

---

iedb\_arb\_mhci\_nmer *Epitope conservation prediction for MHCI using IEDB-ARB server information*

---

**Description**

iedb\_arb\_mhci\_nmer is a method to predict conservation of epitopes among orthologs for MHCI using IEDB-ARB server data

**Usage**

```
iedb_arb_mhci_nmer(clas)
```

**Arguments**

clas            A character vector for server name

**Details**

This function takes server name "IEDB\_arb\_mhci" as input into clas object. IEDB-ARB server provides epitopes of different length.

**Value**

iedb\_arb\_mhci\_nmer() will write two files in the working directory. One file contains the information of epitope and the other file contains metadata for epitope showing orthologs of H37Rv

**Author(s)**

Deepika Kulshreshtha

**Examples**

```
## Not run: iedb_arb_mhci_nmer("IEDB_arb_mhci")##Here IEDB_arb_mhci_nmer will provide con
```

---

```
iedb_consensus_mhcii_nmer
```

*Epitope conservation prediction for MHCII using IEDB-consensus information*

---

### Description

`iedb_consensus_mhcii_nmer` is a method to predict conservation of epitopes among orthologs for MHCII using IEDB-consensus server data

### Usage

```
iedb_consensus_mhcii_nmer (clas)
```

### Arguments

`clas`                    A character vector for server name

### Details

This function takes server name "IEDB\_consensusMHCII" as input into `clas` object. IEDB-consensus provides epitopes of different length.

### Value

`iedb_consensus_mhcii_nmer()` will write two files in the working directory. One file contains the information of epitope and the other file contains metadata for epitope showing orthologs of H37Rv

### Author(s)

Deepika Kulshreshtha

### Examples

```
## Not run: iedb_consensus_mhcii_nmer("IEDB_consensusMHCII")##Here IEDB_consensus_mhcii_n
```

---

```
iedb_consensus_mhci_nmer
```

*Epitope conservation prediction for MHCI using IEDB-consensus information*

---

### Description

`iedb_consensus_mhci_nmer` is a method to predict conservation of epitopes among orthologs for MHCI using IEDB-consensus server data

### Usage

```
iedb_consensus_mhci_nmer (epi_length)
```



**Arguments**

epi\_length    A character vector of epitope length

**Details**

This function takes epitope length as input into epi\_length object. IEDB server provides epitopes by selecting window size of epitope length such as 8, 9, 10. Therefore epi\_length should be given as "10mer".

**Value**

iedb\_consensus\_mhci\_nmer() will write two files in the working directory. One file contains the information of epitope and the other file contains metadata for epitope showing orthologs of H37Rv

**Author(s)**

Deepika Kulshreshtha

**Examples**

```
## Not run: iedb_consensus_mhci_nmer("10mer") ## Here IEDB_consensus_mhci_nmer will provide
```

---

|               |                                                                                                       |
|---------------|-------------------------------------------------------------------------------------------------------|
| netmhcNN_nmer | <i>Epitope conservation prediction from NetMHC server 3.0 using artificial neural networks (ANNs)</i> |
|---------------|-------------------------------------------------------------------------------------------------------|

---

**Description**

netmhcNN\_nmer is a method to conservation of epitopes among orthologs from NetMHC server 3.0 using artificial neural networks (ANNs)

**Usage**

```
netmhcNN_nmer(epi_length)
```

**Arguments**

epi\_length    A character vector of epitope length

**Details**

This function takes epitope length as input into epi\_length object. NetMHC server 3.0 provides epitopes by selecting window size of epitope length such as 8mer, 9mer, 10mer, 11mer. Therefore epi\_length should be given as "10mer".

**Value**

netmhcNN\_nmer() will write two files in the working directory. One file contains the information of epitope and the other file contains metadata for epitope showing orthologs of H37Rv

**Author(s)**

Deepika Kulshreshtha

**Examples**

```
## Not run: netmhcNN_nmer("10mer") ##Here netmhcNN_nmer will provide conservation of epitope
```

---

|               |                                                                                     |
|---------------|-------------------------------------------------------------------------------------|
| netmhcWT_nmer | <i>Epitope conservation prediction from NetMHC server 3.0 using weight matrices</i> |
|---------------|-------------------------------------------------------------------------------------|

---

**Description**

netmhcWT\_nmer is a method to conservation of epitopes among orthologs from NetMHC server 3.0 using weight matrices

**Usage**

```
netmhcWT_nmer(epi_length)
```

**Arguments**

epi\_length    A character vector of epitope length

**Details**

This function takes epitope length as input into epi\_length object. NetMHC server 3.0 provides epitopes by selecting window size of epitope length such as 8mer, 9mer, 10mer, 11mer. Therefore epi\_length should be given as "10mer".

**Value**

netmhcWT\_nmer() will write two files in the working directory. One file contains the information of epitope and the other file contains metadata for epitope showing orthologs of H37Rv

**Author(s)**

Deepika Kulshreshtha

**Examples**

```
## Not run: netmhcWT_nmer("10mer") ##Here netmhcWT_nmer will provide conservation of epitope
```

---

`propred_nmer`*Epitope conservation prediction from Propred server*

---

**Description**

`propred_nmer` is a method to conservation of epitopes among orthologs from Propred server

**Usage**

```
propred_nmer(epi_length)
```

**Arguments**

`epi_length` A character vector of epitope length

**Details**

This function takes epitope length as input into `epi_length` object. Propred server provide epitopes by selecting window size of epitope length such as 10, 12, 14, 16, 18, 20. Therefore `epi_length` should be given as "10mer".

**Value**

`propred_nmer()` will write two files in the working directory. One file contains the information of epitope and the other file contains metadata for epitope showing orthologs of H37Rv

**Author(s)**

Deepika Kulshreshtha

**Examples**

```
## Not run: propred_nmer("9mer") ## Here propred_nmer will provide conservation of epitopes
```

# Index

## \*Topic **Function**

abcpred\_nmer, 1  
algpred, 2  
allermatch, 3  
bcepred\_nmer, 4  
bimas\_nmer, 4  
filter.firstlayer, 5  
iedb\_arb\_mhci\_nmer, 7  
iedb\_arb\_mhcii\_nmer, 6  
iedb\_consensus\_mhci\_nmer, 8  
iedb\_consensus\_mhcii\_nmer, 7  
netmhcNN\_nmer, 9  
netmhcWT\_nmer, 10  
propred\_nmer, 10

abcpred\_nmer, 1  
algpred, 2, 3  
allermatch, 3, 3

bcepred\_nmer, 4  
bimas\_nmer, 4

filter.firstlayer, 5

iedb\_arb\_mhci\_nmer, 7  
iedb\_arb\_mhcii\_nmer, 6  
iedb\_consensus\_mhci\_nmer, 8  
iedb\_consensus\_mhcii\_nmer, 7

netmhcNN\_nmer, 9  
netmhcWT\_nmer, 10

propred\_nmer, 10
